# Supplementary material
Source: PubMed Central journal article supplement (PMC2862477)

## Bioactive Constituents of the Stem Bark of *Mitrephora glabra*

Chen Li, Dongho Lee, Tyler N. Graf, Sharnelle S. Phifer, Yuka Nakanishi, Soedarsono Riswan, Fransisca M. Setyowati, Achmad M. Saribi, Djaja D. Soejarto, Norman R. Farnsworth, Joseph O. Falkinham, III, David J. Kroll, A. Douglas Kinghorn, Mansukh C. Wani, and Nicholas H. Oberlies

### Supporting Information

| Contents:                                                                                                     | Page: |
|---------------------------------------------------------------------------------------------------------------|-------|
| 1. <sup>1</sup> H NMR spectrum of 4- <i>epi</i> -kaurenic acid ( <b>1</b> ; spectrum labeled as 10046-175-4)  | 2     |
| 2. <sup>13</sup> C NMR spectrum of 4- <i>epi</i> -kaurenic acid ( <b>1</b> ; spectrum labeled as 10046-175-4) | 3     |
| 3. <sup>1</sup> H NMR spectrum of mitrekaurenone ( <b>2</b> ; spectrum labeled as 10395-94-2)                 | 4     |
| 4. <sup>13</sup> C NMR spectrum of mitrekaurenone ( <b>2</b> ; spectrum labeled as 10395-94-2)                | 5     |
| 5. <sup>1</sup> H NMR spectrum of methylmitrekaurenate ( <b>3</b> ; spectrum labeled as 10395-111-1)          | 6     |
| 6. <sup>13</sup> C NMR spectrum of methylmitrekaurenate ( <b>3</b> ; spectrum labeled as 10395-111-1)         | 7     |
| 7. <sup>1</sup> H NMR spectrum of methyloropheate ( <b>5</b> ; spectrum labeled as 10395-115-1)               | 8     |
| 8. <sup>13</sup> C NMR spectrum of methyloropheate ( <b>5</b> ; spectrum labeled as 10395-115-1)              | 9     |
| 9. <sup>1</sup> H NMR spectrum of oropheolide ( <b>7</b> ; spectrum labeled as 10395-105-2)                   | 10    |
| 10. <sup>13</sup> C NMR spectrum of oropheolide ( <b>7</b> ; spectrum labeled as 10395-105-2)                 | 11    |
| 11. <sup>1</sup> H NMR spectrum of 9,10-dihydrooropheolide ( <b>8</b> ; spectrum labeled as 10395-105-4)      | 12    |
| 12. <sup>13</sup> C NMR spectrum of 9,10-dihydrooropheolide ( <b>8</b> ; spectrum labeled as 10395-105-4)     | 13    |

10046-175-4

expt s2pu1

|             |         |       |           |         |
|-------------|---------|-------|-----------|---------|
| date        | 9       | 2003  | DEC. & VT | 500.150 |
| solvent     | Jul     | GDC13 |           | H1      |
| file        | exp     |       |           | 30      |
| ACQUISITION | exp     |       |           | 0       |
| sfrq        | 500.149 |       |           | nmn     |
| tn          | H1      |       |           | C       |
| at          | 1.892   |       |           | 200     |
| np          | 15164   |       |           |         |
| sw          | 4007.4  |       |           | 1.0     |
| fb          | 2000    |       |           | n       |
| bs          | 32      |       | DEC2      |         |
| tpwr        | 36      |       |           | 0       |
| pw          | 5.5     |       |           |         |
| d1          | 0       |       |           | 1       |
| tof         | -625.2  |       |           | 0       |
| nt          | 8       |       |           | n       |
| ct          | 8       |       |           | C       |
| alock       | n       |       |           | 200     |
| gain        | 2       |       |           |         |
| FLAGS       |         |       |           | 1.0     |
| il          | n       |       |           | n       |
| in          | n       |       |           |         |
| dp          | y       |       |           |         |
| hs          | nn      |       |           |         |
| DISPLAY     | -141.4  |       |           |         |
| SP          | 4006.9  |       |           |         |
| WP          | 128     |       |           |         |
| VS          | 35      |       |           |         |
| WC          | 215     |       |           |         |
| hzm         | 18.62   |       |           |         |
| is          | 1483.26 |       |           |         |
| rfl         | 141.9   |       |           |         |
| rft         | 0       |       |           |         |
| th          | 4       |       |           |         |
| ins         | 1.000   |       |           |         |
| nm          | cdc     |       |           |         |
| ph          |         |       |           |         |

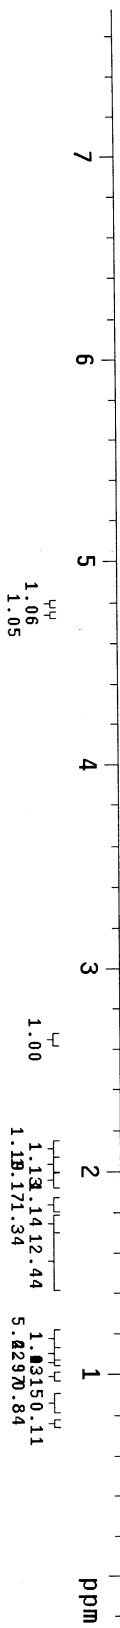



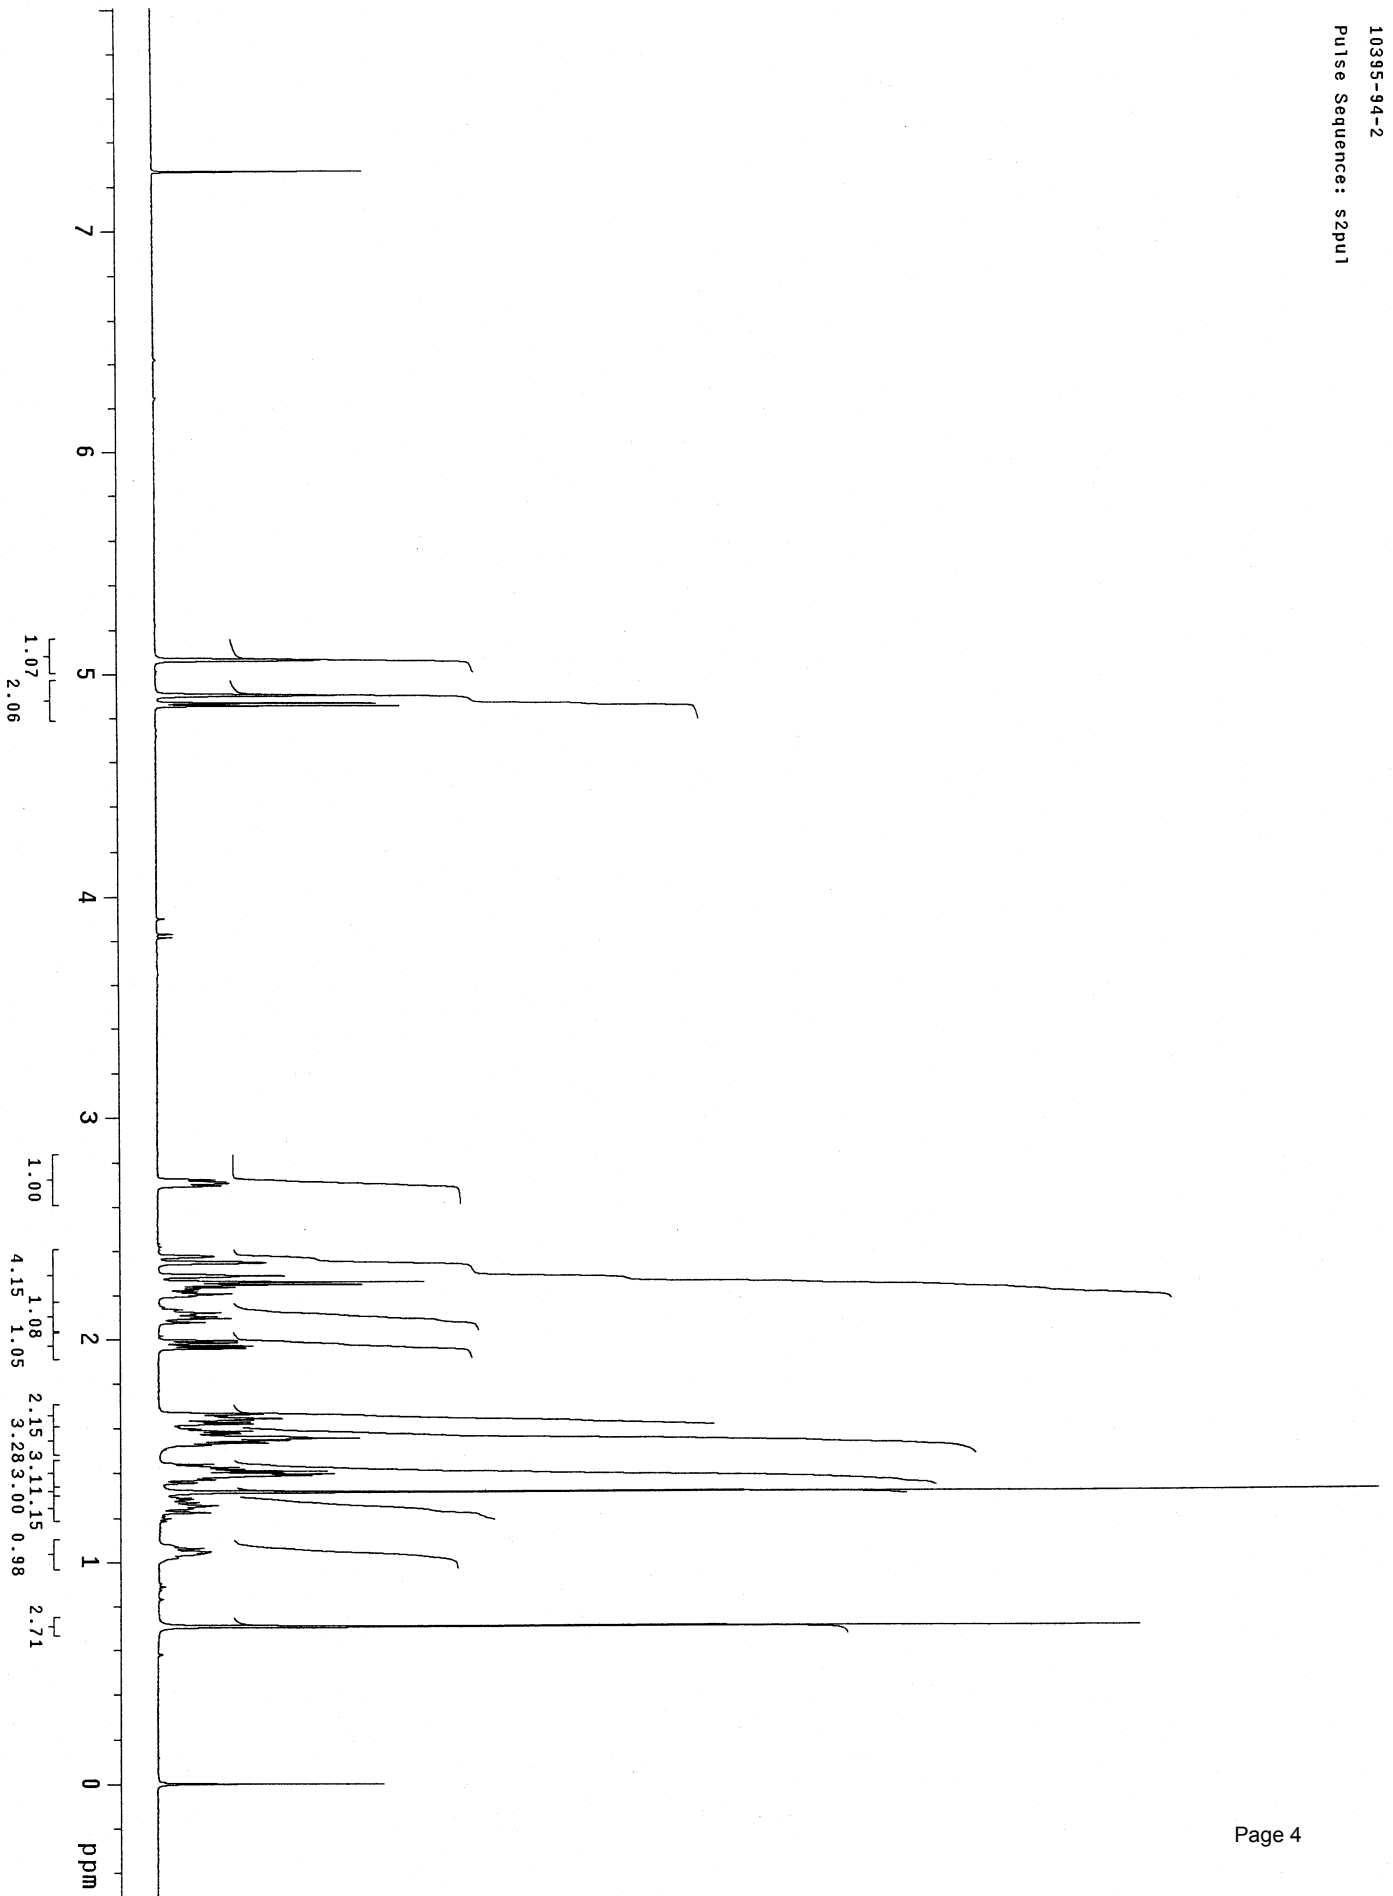

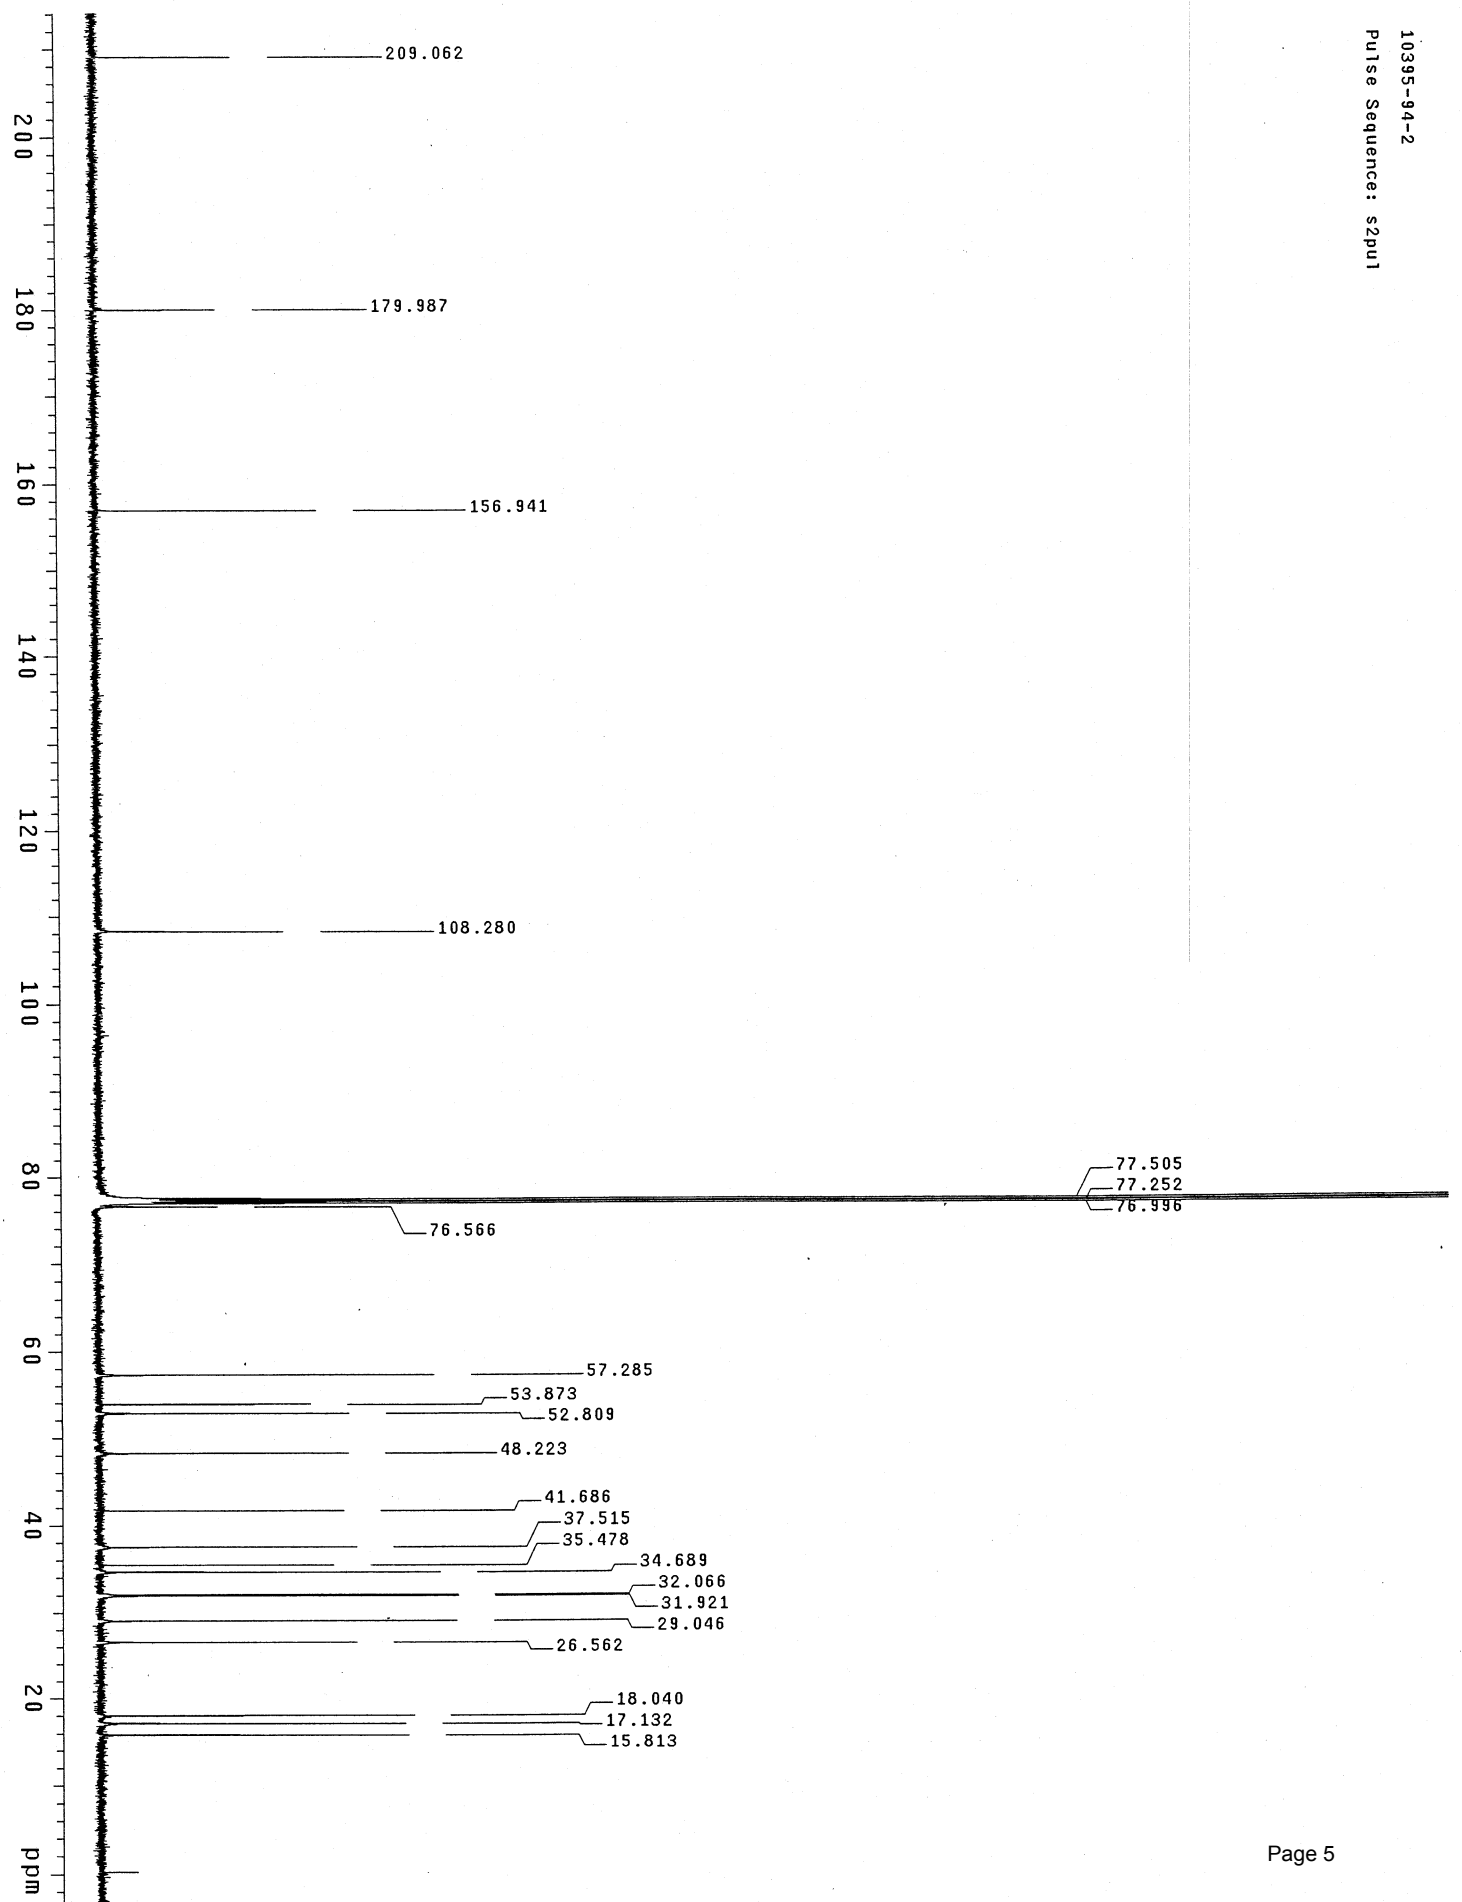

10395-111-1

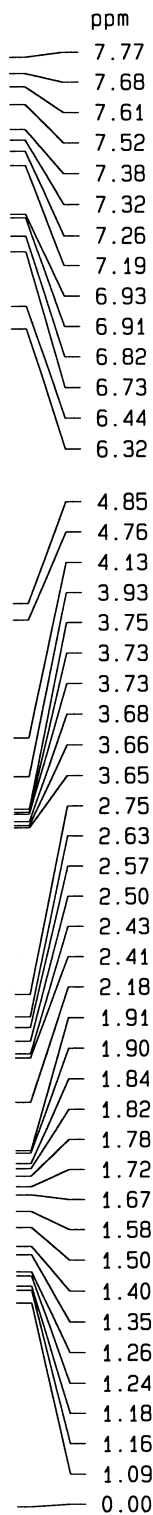

Current Data Parameters  
NAME 10395-111-1  
EXPNO 80  
PROCNO 1

F2 - Acquisition Parameters  
Date\_ 20040318  
Time 18.39

INSTRUM spect  
PROBHD 5 mm QNP 1H/  
PULPROG zg  
TD 32768  
SOLVENT CDCl3  
NS 16  
DS 2

SMH 6172.839 Hz  
FIDRES 0.188380 Hz  
AQ 2.6542580 sec

RG 256  
DM 81.000 usec  
DE 6.00 usec  
TE 300.0 K

D1 1.00000000 sec  
P1 12.00 usec  
SFO1 300.1318534 MHz  
NUC1 1H  
PL1 0.00 dB

F2 - Processing parameters

SI 16384  
SF 300.1300107 MHz  
WDW EM  
SSB 0  
LB 0.30 Hz  
GB 0  
PC 1.00

1D NMR plot parameters

CX 20.00 cm  
F1P 8.042 ppm  
F1 2413.55 Hz  
F2P -0.068 ppm  
F2 -20.46 Hz  
PPMCM 0.40549 ppm/cm  
HZCM 121.70029 Hz/cm

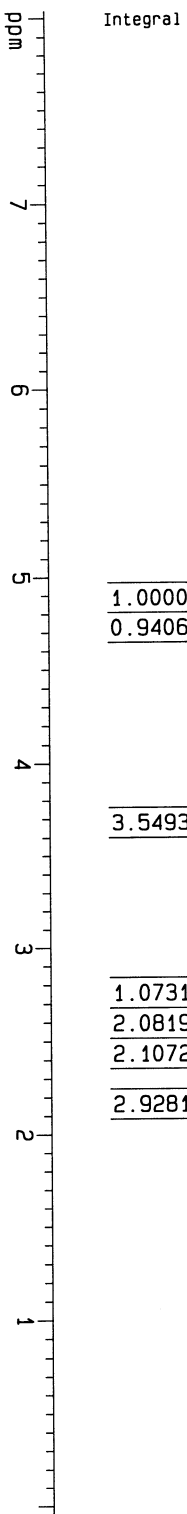

10395-111-1 carbon

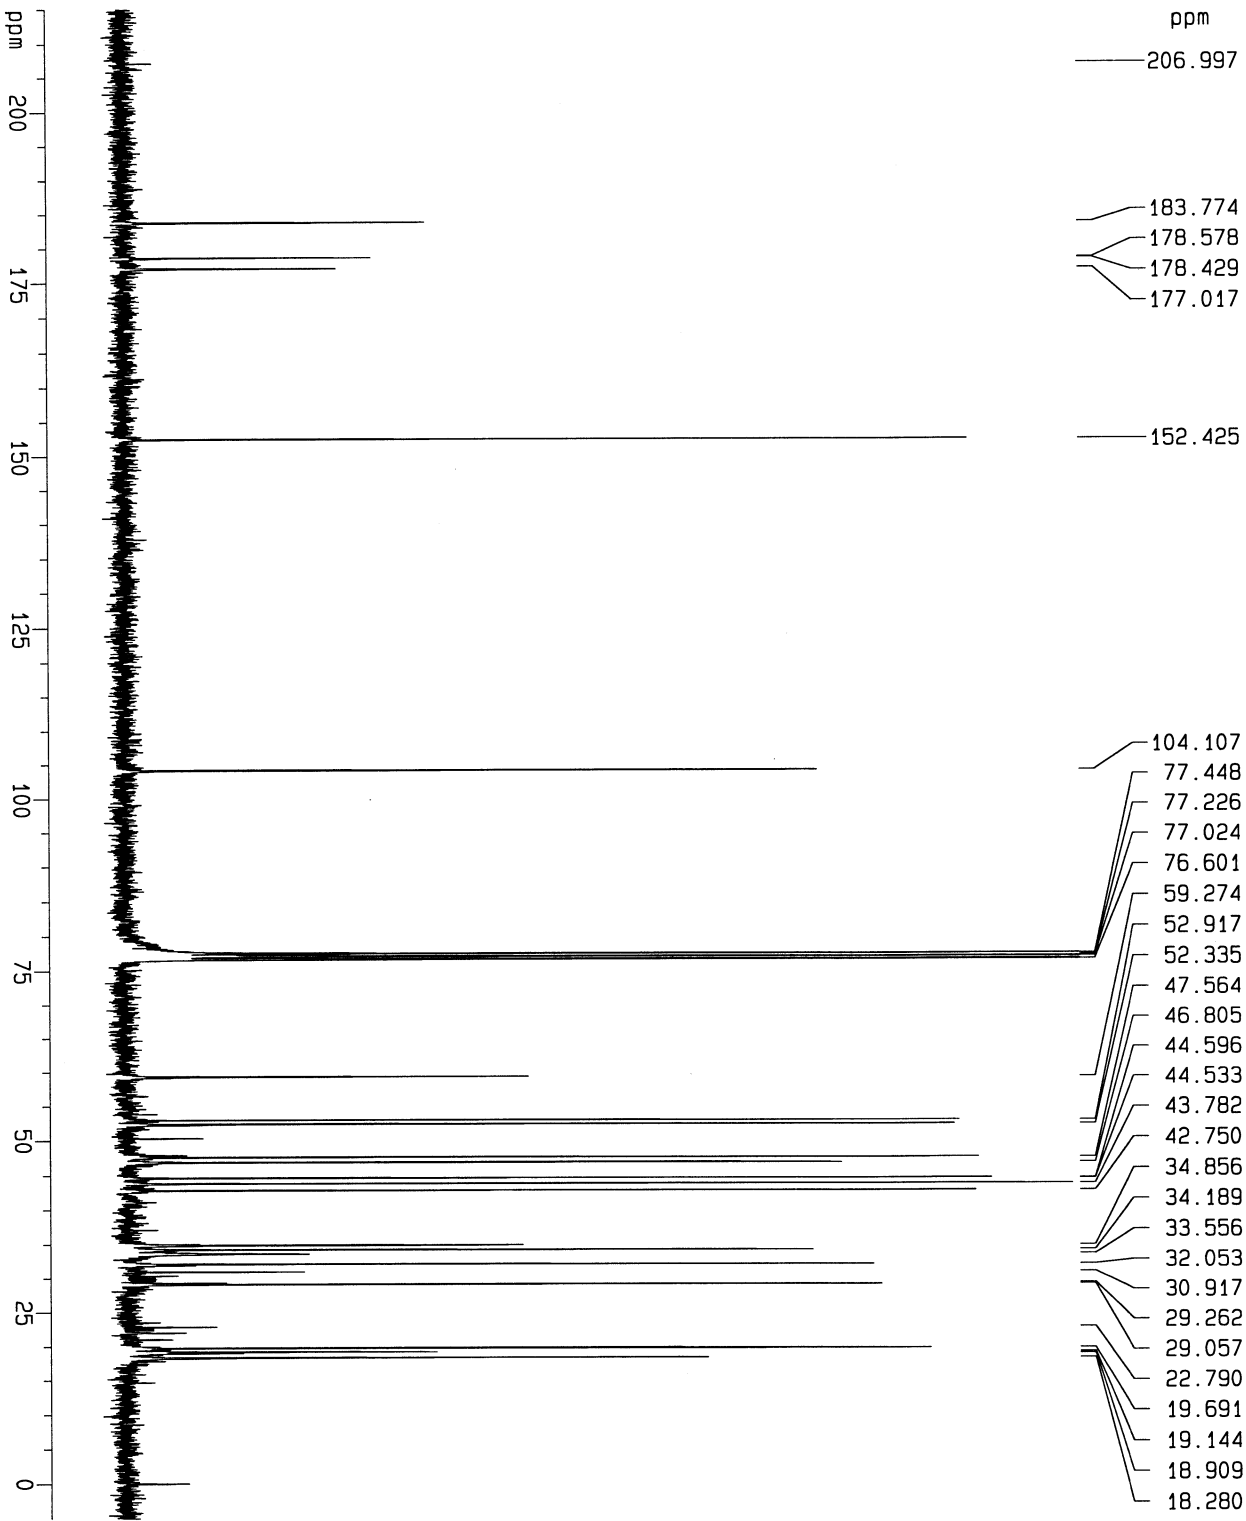

Current Data Parameters  
 NAME 10395-111-1  
 EXPNO 90  
 PROCNO 1

F2 - Acquisition Parameters

Date\_ 20040321  
 Time 18.29  
 INSTRUM spect  
 PROBHD 5 mm QNP 1H/  
 PULPROG zgdc  
 TD 65536  
 SOLVENT CDCl3  
 NS 15428  
 DS 2  
 SMH 23809.523 Hz  
 FIDRES 0.363304 Hz  
 AQ 1.3763061 sec  
 RG 5160.6  
 DW 21.000 usec  
 DE 6.00 usec  
 TE 300.0 K  
 d11 0.03000000 sec  
 PL12 16.00 dB  
 CPDPRG2 waltz16  
 PCPD2 80.00 usec  
 SFO2 300.1312005 MHz  
 NUC2 1H  
 PL2 -6.00 dB  
 D1 2.00000000 sec  
 P1 5.50 usec  
 SFO1 75.4772501 MHz  
 NUC1 13C  
 PL1 -6.00 dB

F2 - Processing parameters

SI 32768  
 SF 75.4677473 MHz  
 MDM EM  
 SSB 0  
 LB 1.00 Hz  
 GB 0  
 PC 1.40

1D NMR plot parameters

CX 20.00 cm  
 F1P 215.000 ppm  
 F1 16225.57 Hz  
 F2P -5.000 ppm  
 F2 -377.34 Hz  
 PPMQCM 11.00000 ppm/cm  
 HZCM 830.14526 Hz/cm

10395-115-1

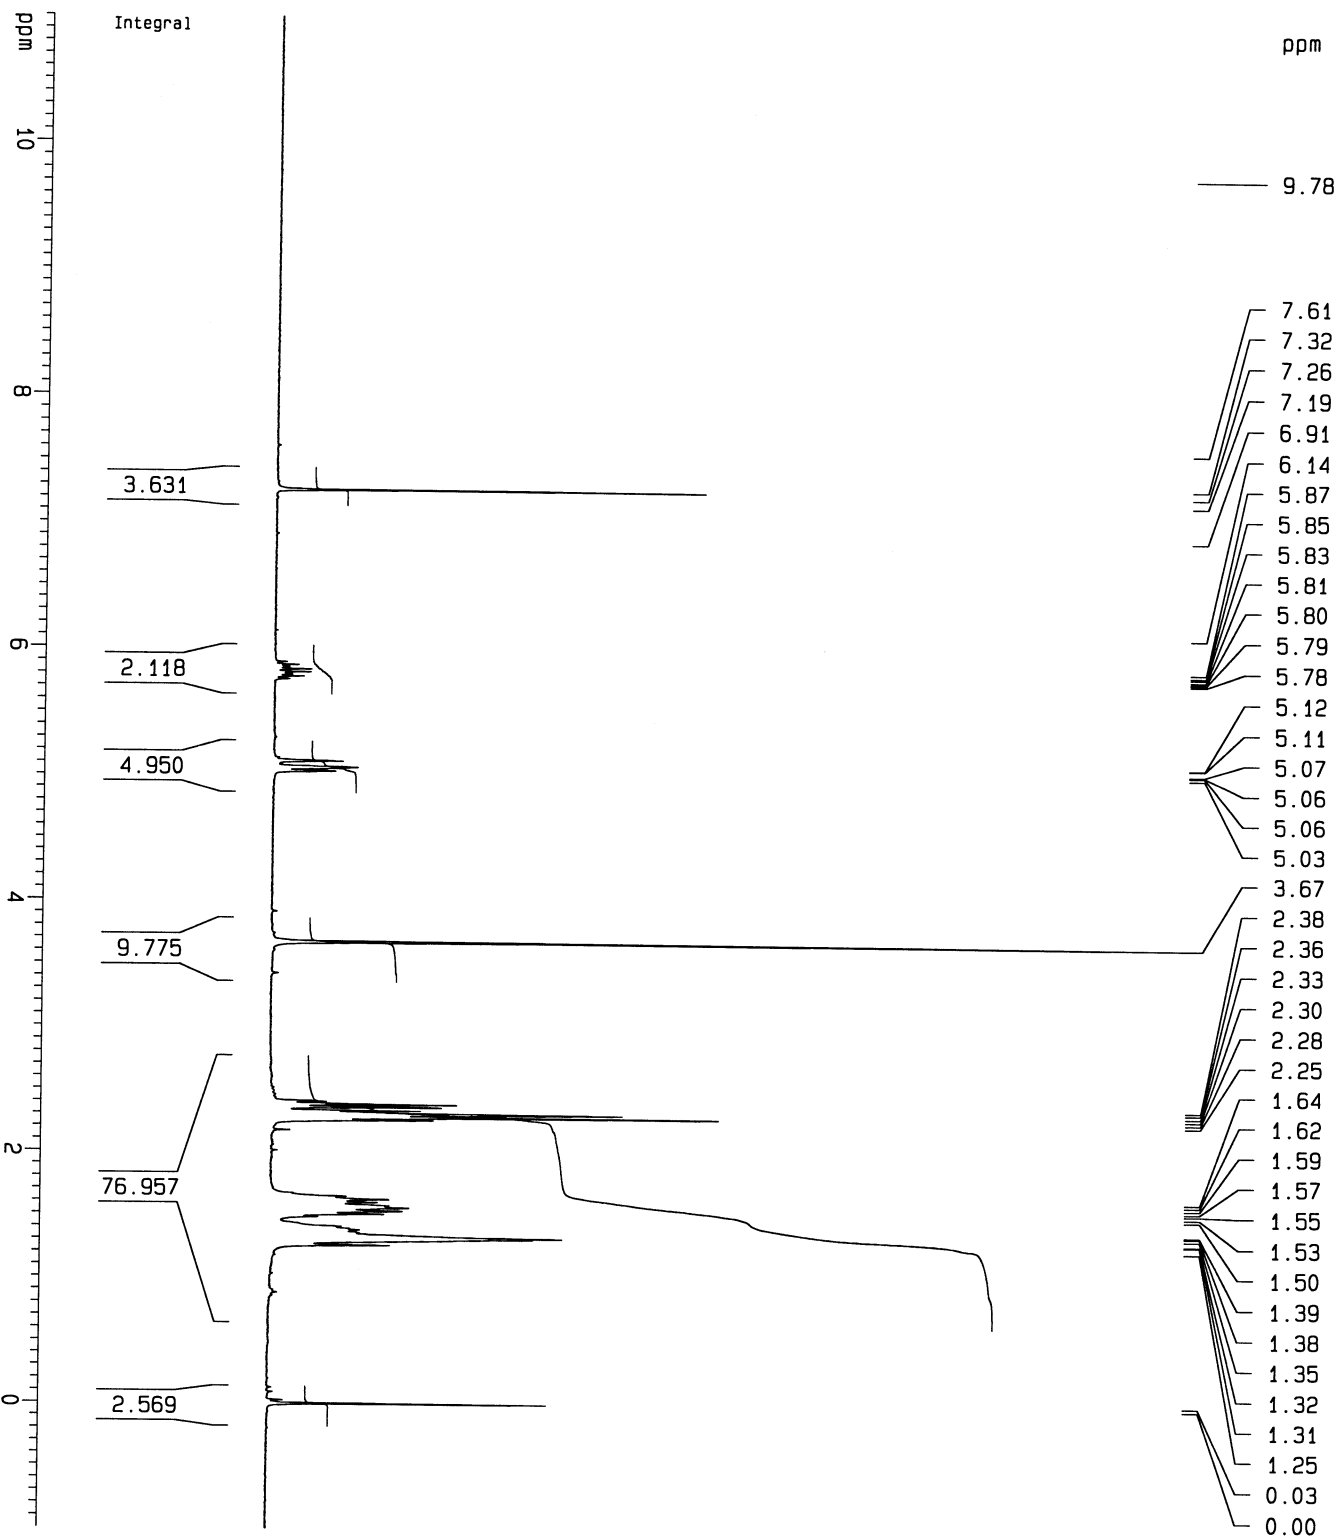

Current Data Parameters  
NAME 10395-115-1  
EXPNO 150  
PROCNO 1

F2 - Acquisition Parameters  
Date\_ 20040323  
Time 18.42  
INSTRUM spect  
PROBHD 5 mm QNP 1H/  
PULPROG zg  
TD 32768  
SOLVENT CDCl3  
NS 16  
DS 2  
SWH 6172.839 Hz  
FIDRES 0.188380 Hz  
AQ 2.6542580 sec  
RG 645.1  
DW 81.000 usec  
DE 6.00 usec  
TE 300.0 K  
D1 1.00000000 sec  
P1 12.00 usec  
SF01 300.1318534 MHz  
NUC1 1H  
PL1 0.00 dB

F2 - Processing parameters  
SI 16384  
SF 300.1300119 MHz  
WDW EM  
SSB 0  
LB 0.30 Hz  
GB 0  
PC 1.00

1D NMR plot parameters  
CX 20.00 cm  
F1P 11.000 ppm  
F1 3301.43 Hz  
F2P -1.000 ppm  
F2 -300.13 Hz  
PPMCM 0.60000 ppm/cm  
HZCM 180.07800 Hz/cm



10395-115-1 carbon

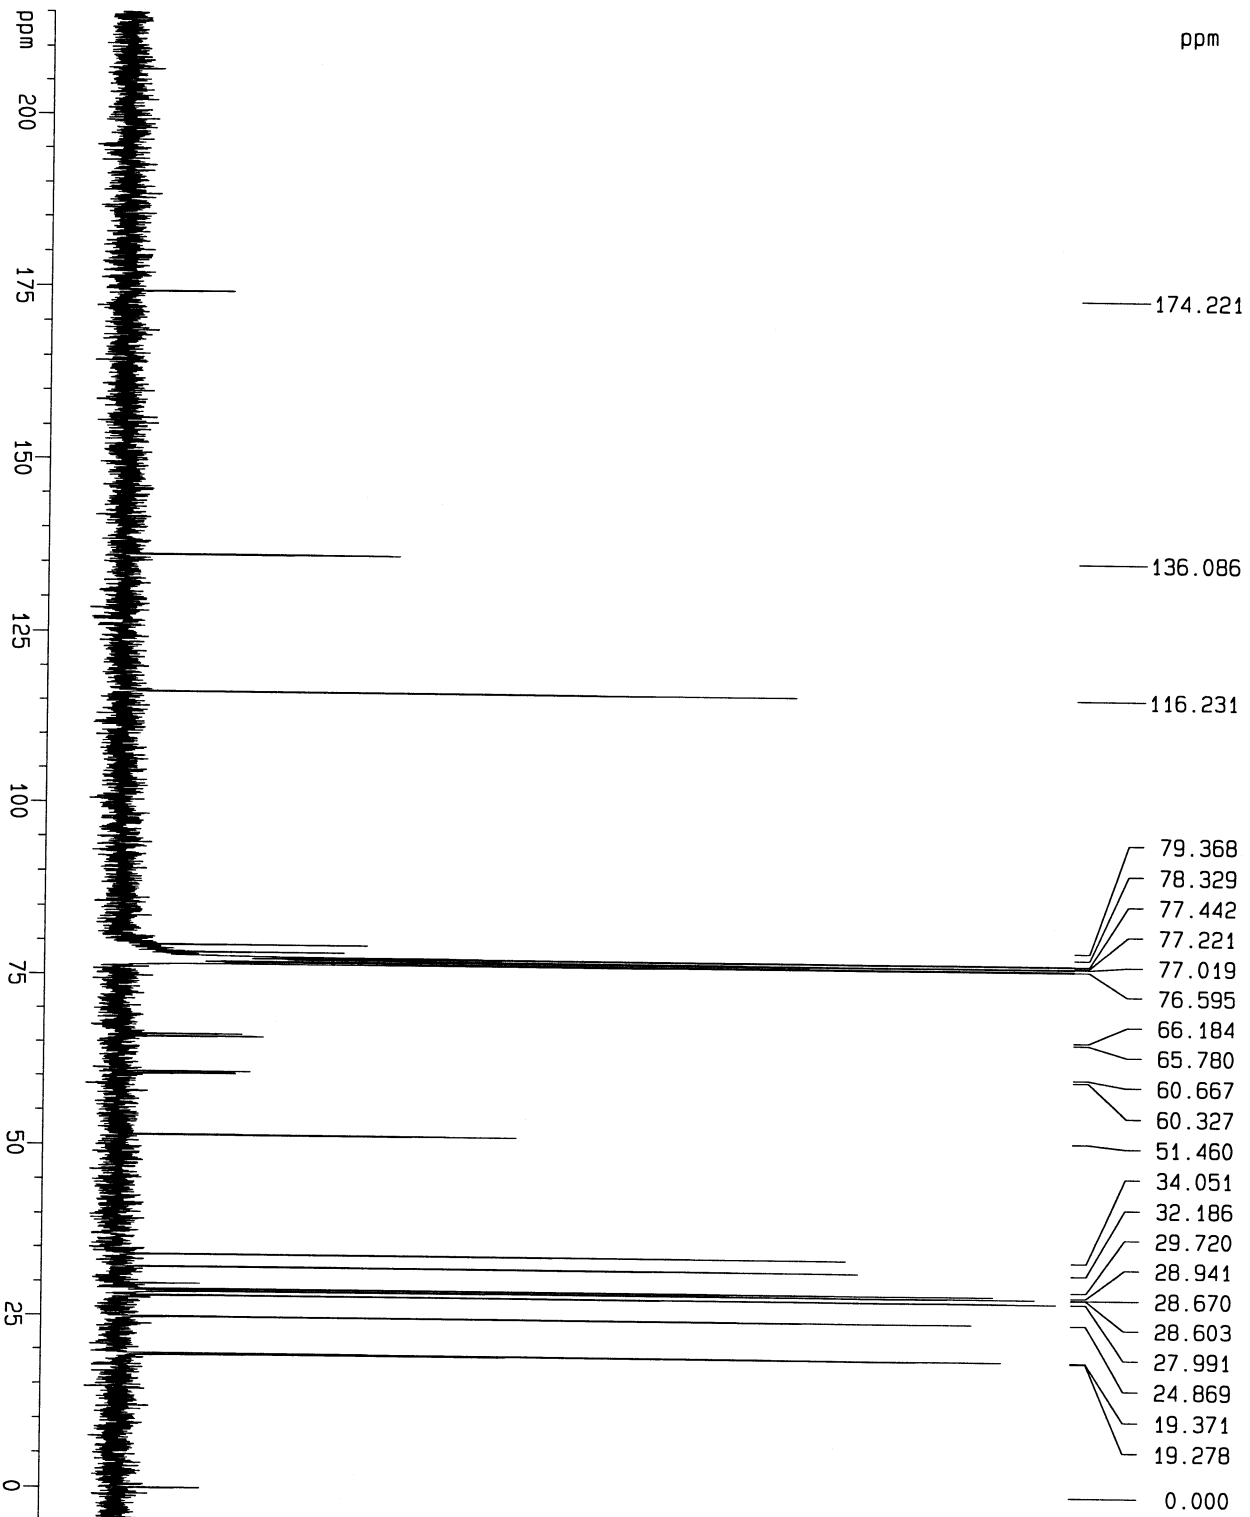

Current Data Parameters  
 NAME 10395-115-1  
 EXPNO 151  
 PROCNO 1

F2 - Acquisition Parameters  
 Date\_ 20040323  
 Time 18.56  
 INSTRUM spect  
 PROBH0 5 mm QNP 1H/  
 PULPROG zgdc  
 TD 65536  
 SOLVENT CDCl3  
 NS 12952  
 DS 2

SWH 23809.523 Hz  
 FIDRES 0.363304 Hz  
 AQ 1.3763061 sec  
 RG 8192  
 DW 21.000 usec  
 DE 6.00 usec  
 TE 300.0 K  
 d11 0.03000000 sec  
 PL12 16.00 dB  
 CPDPRG2 waltz16  
 PCPD02 80.00 usec  
 SF02 300.1312005 MHz  
 NUC2 1H  
 PL2 -6.00 dB  
 D1 2.00000000 sec  
 P1 5.50 usec  
 SF01 75.4772501 MHz  
 NUC1 13C  
 PL1 -6.00 dB

F2 - Processing parameters  
 SI 32768  
 SF 75.4677473 MHz  
 MDW EM  
 SSB 0  
 LB 1.00 Hz  
 GB 0  
 PC 1.40

1D NMR plot parameters  
 CX 20.00 cm  
 F1p 215.000 ppm  
 F1 16225.57 Hz  
 F2p -5.000 ppm  
 F2 -377.34 Hz  
 PPMCM 11.00000 ppm/cm  
 HZCM 830.14526 Hz/cm

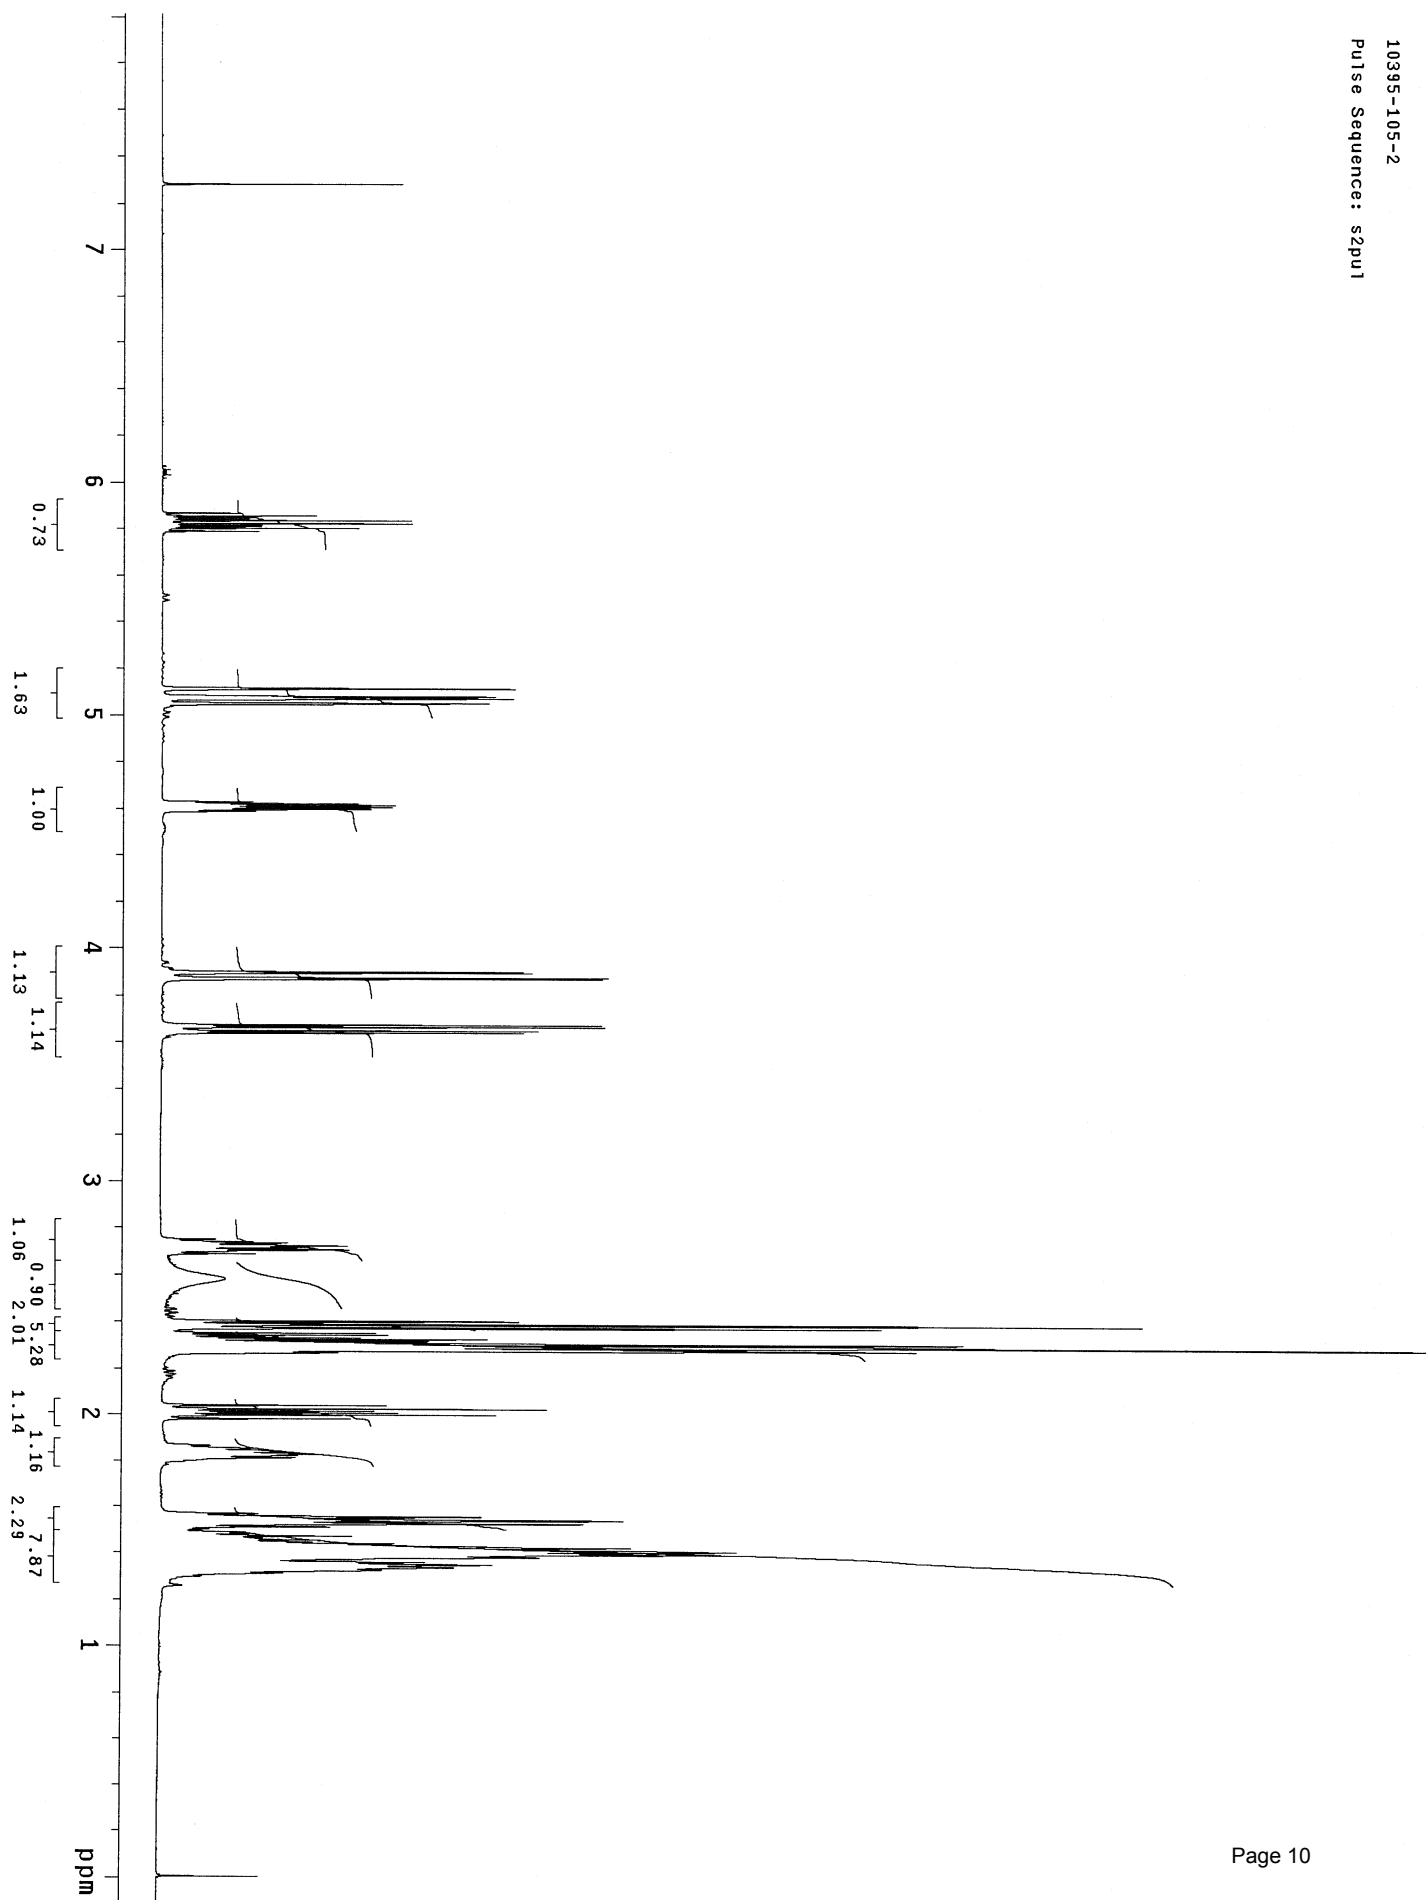

10395-105-2 carbon

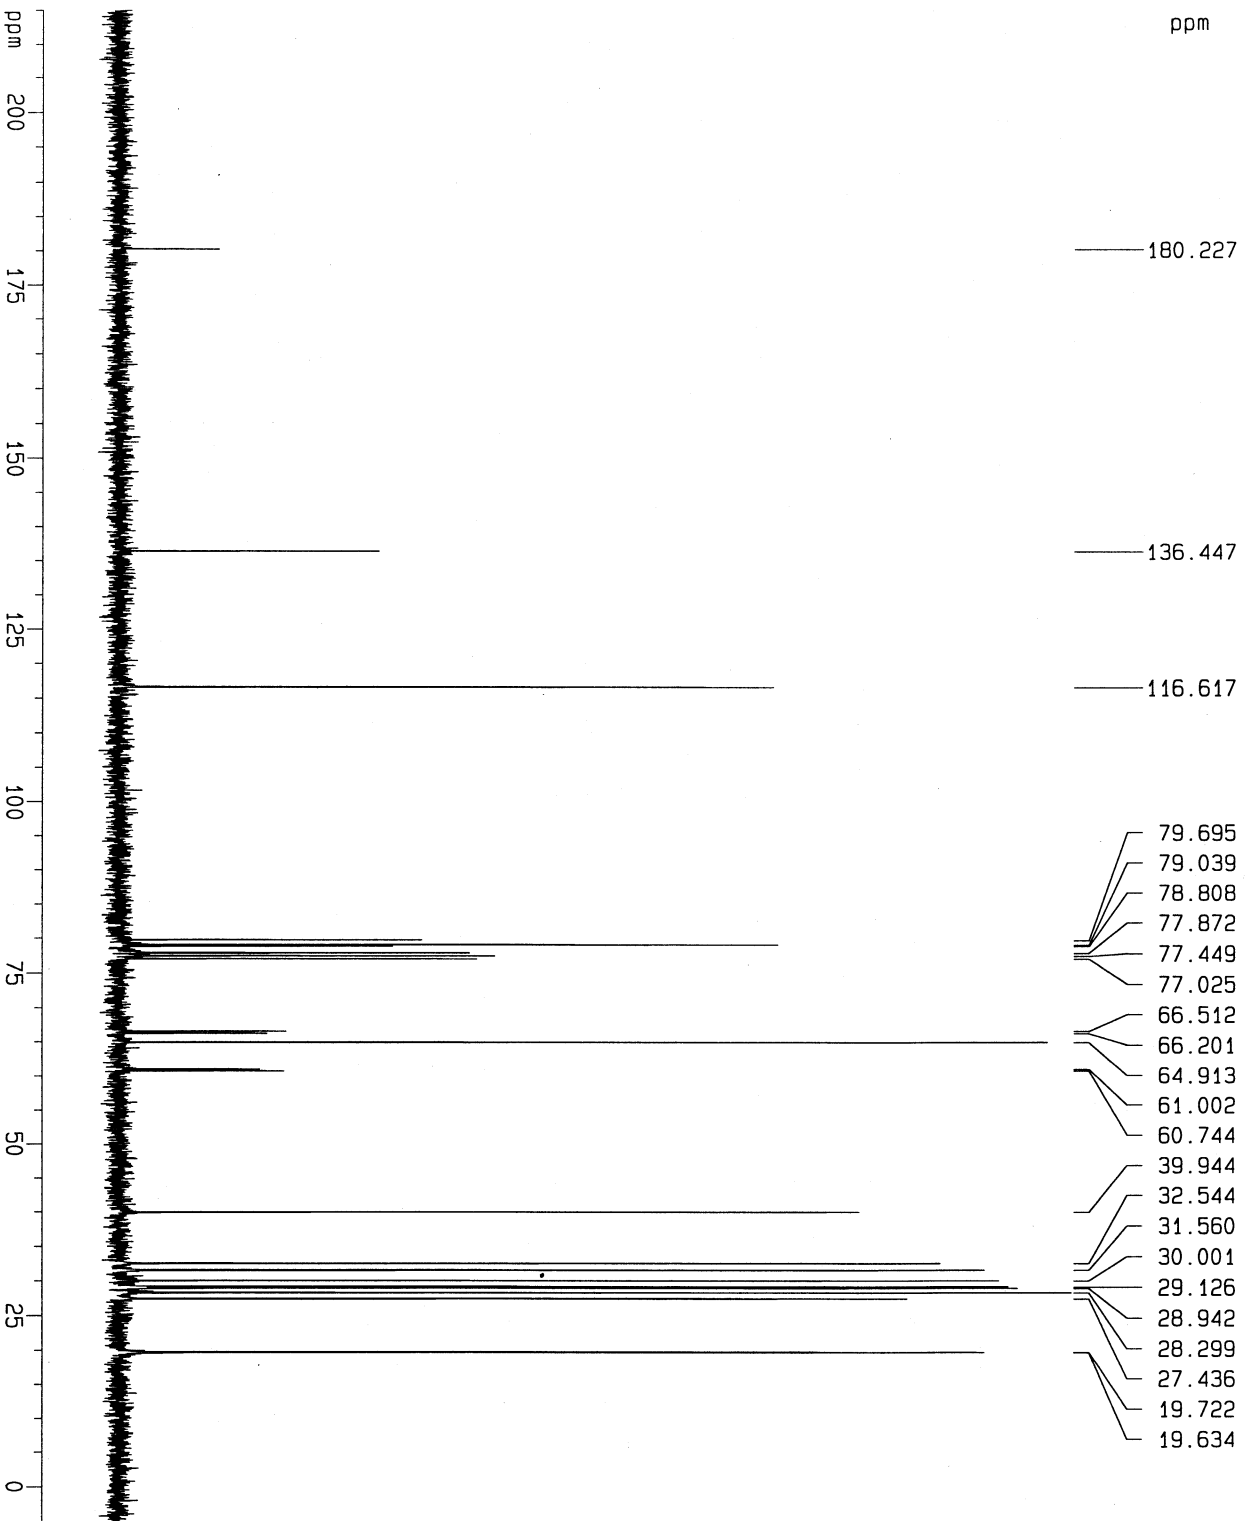

Current Data Parameters  
 NAME 10395-105-2  
 EXPNO 61  
 PROCNO 1

F2 - Acquisition Parameters

Date\_ 20040218  
 Time 12.16  
 INSTRUM spect  
 PROBHD 5 mm QNP 1H/  
 PULPROG zgpg  
 TD 65536  
 SOLVENT CDCl3  
 NS 288  
 DS 2  
 SMH 23809.523 Hz  
 FIDRES 0.363304 Hz  
 AQ 1.3763061 sec  
 RG 4096  
 DW 21.000 usec  
 DE 6.00 usec  
 TE 300.0 K  
 d11 0.03000000 sec  
 PL12 16.00 dB  
 CDDPRG2 waltz16  
 PCPD2 80.00 usec  
 SFO2 300.1312005 MHz  
 NUC2 1H  
 PL2 -6.00 dB  
 D1 2.00000000 sec  
 P1 5.50 usec  
 SFO1 75.4772501 MHz  
 NUC1 13C  
 PL1 -6.00 dB

F2 - Processing parameters

SI 32768  
 SF 75.4677190 MHz  
 MDW EM  
 SSB 0  
 LB 1.00 Hz  
 GB 0  
 PC 1.40

1D NMR plot parameters

CX 20.00 cm  
 F1P 215.000 ppm  
 F1 16225.56 Hz  
 F2P -5.000 ppm  
 F2 -377.34 Hz  
 PPMCM 11.00000 ppm/cm  
 HZCM 830.14490 Hz/cm

10395-105-4

Pulse Sequence: s2pu1  
Solvent: CDCl3  
Ambient temperature  
File: PROTON\_1rv  
INOVA-500 "tesla"

Pulse 50.9 degrees  
Acq. time 1.892 sec  
Width 4256.5 Hz  
8 repetitions  
OBSERVE H1 500.1472484 MHz  
DATA PROCESSING  
Line broadening 0.5 Hz  
Gauss apodization 2.460 sec  
FT size 16384  
Total time 0 min, 15 sec

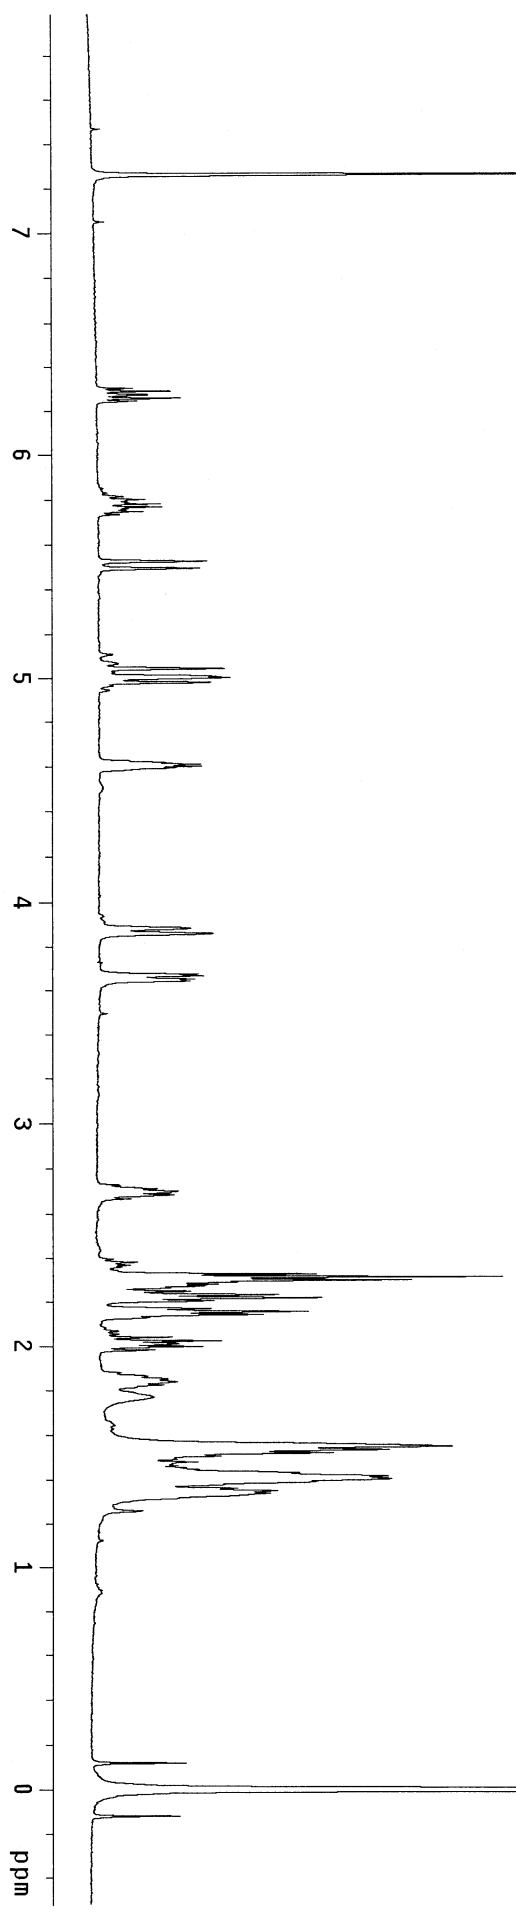

10395-105-4

Pulse Sequence: s2pu1

Solvent: CDCl3

Ambient temperature

User: 1-14-87

File: CARBON

INOVA-500 "test1a"

Pulse 31.0 degrees  
Acq. time 1.300 sec  
Width 25000.0 Hz  
25000 repetitions  
OBSERVE C13, 125.7620933 MHZ  
DECUPLE H1, 500.1497399 MHZ  
Power 40 dB,  
continuously on  
WALTZ-16 modulated  
DATA PROCESSING  
Line broadening 1.0 Hz  
FT size 65536  
Total time 9 hr, 5 min, 34 sec

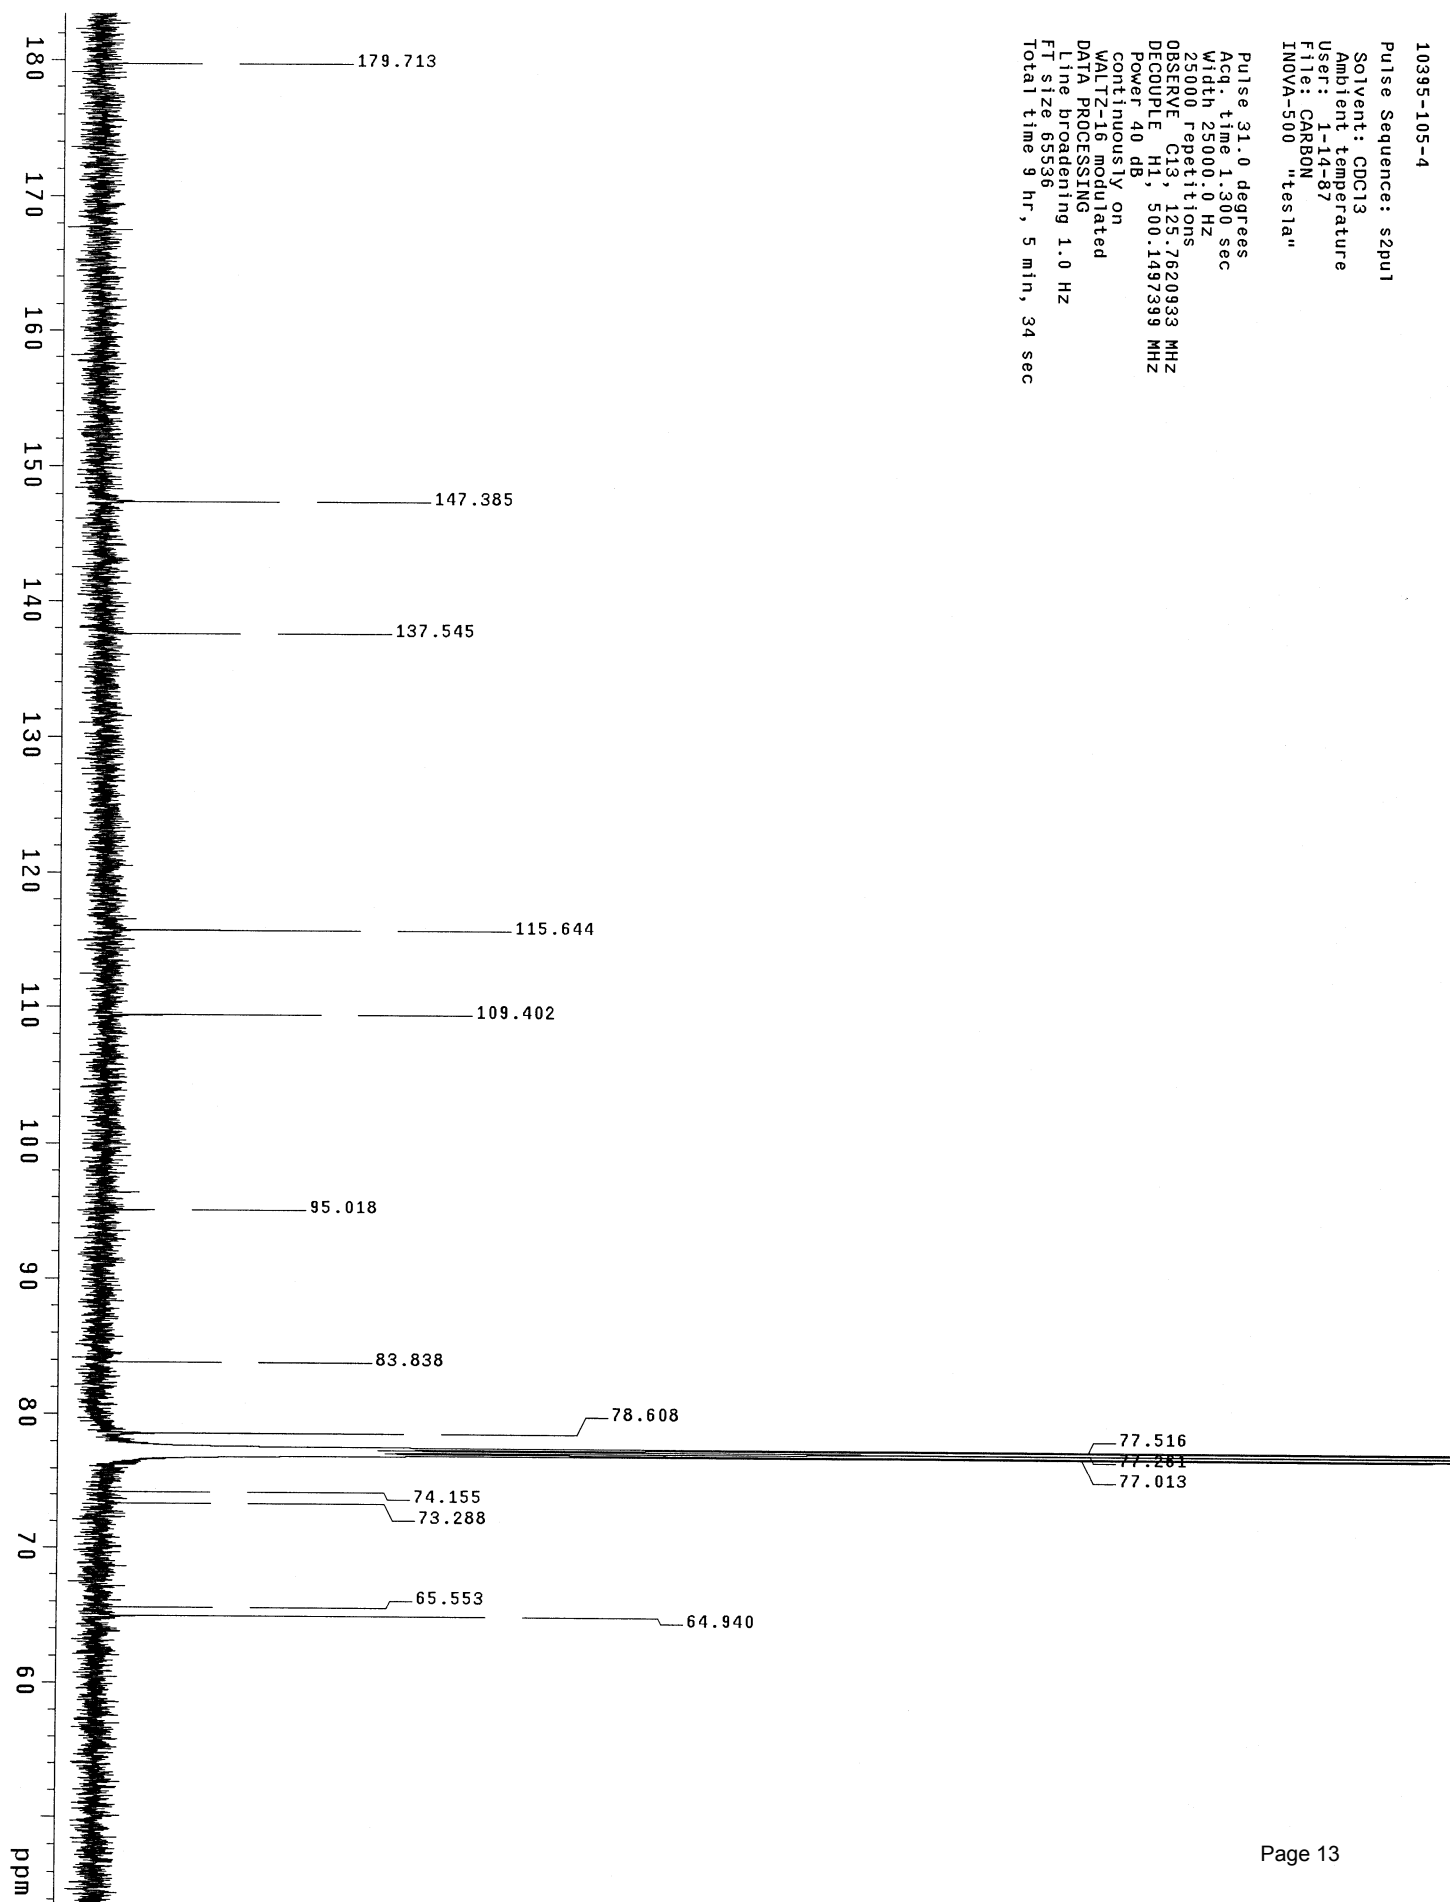

Supplement: NIHMS156423-supplement-1_si_001.pdf [file NIHMS156423-supplement-1_si_001.pdf]
